# Supplementary material for: Functional strain redundancy and persistent phage infection in Swiss hard cheese starter cultures
Source: PubMed Central journal article supplement (PMC8776748; doi:10.1038/s41396-021-01071-0), 2021-08-06
Supplement: 41396_2021_1071_MOESM2_ESM.pdf [file 41396_2021_1071_MOESM2_ESM.pdf]

Supplement: Functional strain  
redundancy and persistent phage  
infection in Swiss hard cheese starter  
cultures

**Table1:** Statistics of all assembled or used genomes. GC stands for Guanine and Cytosine percentage in the genome. CRISPR stands for the number of CRISPR arrays annotated. BUSCO stands for the percent Busco completeness predicted.

| Species                | Strain  | Technology  | # Contigs | Genome size | GC | Prophage | Plasmid | genes | Pseudogenes | rRNA | tRNA | transposase | CRISPR | BUSCO |
|------------------------|---------|-------------|-----------|-------------|----|----------|---------|-------|-------------|------|------|-------------|--------|-------|
| <i>S. thermophilus</i> | 13494   | Nanopore&I. | 2         | 1882333     | 39 | 0        | 1       | 1946  | 230         | 88   | 67   | 79          | 3      | 99    |
| <i>S. thermophilus</i> | 13496   | Nanopore&I. | 1         | 1895875     | 39 | 0        | 0       | 1980  | 232         | 89   | 67   | 105         | 2      | 99    |
| <i>S. thermophilus</i> | 13498   | Nanopore&I. | 1         | 1865049     | 39 | 0        | 0       | 1934  | 223         | 88   | 66   | 81          | 3      | 99    |
| <i>S. thermophilus</i> | 13499   | Nanopore&I. | 1         | 1885735     | 39 | 0        | 0       | 1976  | 237         | 89   | 67   | 99          | 3      | 98    |
| <i>S. thermophilus</i> | 24737   | Nanopore&I. | 2         | 1868869     | 39 | 0        | 1       | 1938  | 229         | 91   | 68   | 81          | 3      | 99    |
| <i>S. thermophilus</i> | 24738   | Nanopore&I. | 1         | 1885982     | 39 | 0        | 0       | 1983  | 248         | 88   | 66   | 99          | 3      | 98    |
| <i>S. thermophilus</i> | 24739   | Nanopore&I. | 1         | 1934999     | 39 | 1        | 0       | 2027  | 234         | 89   | 67   | 103         | 2      | 99    |
| <i>S. thermophilus</i> | 24740   | Nanopore&I. | 1         | 1880058     | 39 | 0        | 0       | 1973  | 247         | 76   | 57   | 98          | 3      | 99    |
| <i>S. thermophilus</i> | 24853   | Nanopore&I. | 1         | 1847542     | 39 | 0        | 0       | 1920  | 221         | 89   | 67   | 73          | 3      | 99    |
| <i>S. thermophilus</i> | 24854   | Nanopore&I. | 2         | 1869650     | 39 | 0        | 1       | 1939  | 225         | 92   | 68   | 81          | 3      | 99    |
| <i>S. thermophilus</i> | 24855   | Nanopore&I. | 2         | 1926384     | 39 | 0        | 1       | 2010  | 261         | 110  | 85   | 85          | 3      | 99    |
| <i>S. thermophilus</i> | 13491   | Illumina    | 46        | 1838081     | 39 | 0        | 0       | 1943  | 233         | 74   | 62   | 92          | 3      | 99    |
| <i>S. thermophilus</i> | 13492   | Illumina    | 40        | 1835354     | 39 | 0        | 0       | 1923  | 229         | 59   | 50   | 89          | 3      | 99    |
| <i>S. thermophilus</i> | 13493   | Illumina    | 54        | 1836485     | 39 | 0        | 0       | 1950  | 236         | 69   | 58   | 101         | 3      | 99    |
| <i>S. thermophilus</i> | 13495   | Illumina    | 104       | 1803669     | 39 | 0        | 0       | 1937  | 251         | 59   | 50   | 91          | 2      | 95    |
| <i>S. thermophilus</i> | 13497   | Illumina    | 63        | 1834883     | 39 | 0        | 0       | 1944  | 238         | 59   | 49   | 100         | 2      | 98    |
| <i>S. thermophilus</i> | 13499c1 | Illumina    | 58        | 1838913     | 39 | 0        | 0       | 1960  | 248         | 63   | 53   | 100         | 3      | 99    |
| <i>S. thermophilus</i> | 13499c2 | Illumina    | 60        | 1839354     | 39 | 0        | 0       | 1965  | 249         | 63   | 53   | 104         | 3      | 99    |
| <i>S. thermophilus</i> | 13500   | Illumina    | 40        | 1831933     | 39 | 0        | 0       | 1938  | 230         | 74   | 62   | 87          | 3      | 99    |
| <i>S. thermophilus</i> | S50     | Illumina    | 43        | 1842362     | 39 | 0        | 0       | 1921  | 231         | 47   | 42   | 74          | 3      | 98    |
| <i>S. thermophilus</i> | S72     | Illumina    | 31        | 1835142     | 39 | 0        | 0       | 1897  | 225         | 49   | 43   | 68          | 3      | 99    |
| <i>S. thermophilus</i> | SMAG    | MAG         | 1         | 1879576     | 39 | 1        | 0       | 1975  | 227         | 89   | 67   | 75          | 3      | 99    |
| <i>S. thermophilus</i> | 19258   | Typestrain  | 1         | 2102268     | 39 | 0        | 0       | 2230  | 287         | 75   | 56   | 100         | 2      | 99    |
| <i>L. delbrueckii</i>  | 11141   | Illumina    | 155       | 1994221     | 49 | 0        | 0       | 2112  | 191         | 96   | 80   | 199         | 3      | 97    |
| <i>L. delbrueckii</i>  | 11142   | Illumina    | 159       | 2017445     | 49 | 0        | 1       | 2140  | 170         | 96   | 79   | 215         | 2      | 98    |
| <i>L. delbrueckii</i>  | 11143   | Illumina    | 164       | 2002804     | 49 | 0        | 1       | 2142  | 185         | 91   | 73   | 225         | 3      | 97    |
| <i>L. delbrueckii</i>  | 12104   | Illumina    | 165       | 2003390     | 49 | 0        | 0       | 2168  | 197         | 100  | 80   | 247         | 3      | 97    |
| <i>L. delbrueckii</i>  | 12105   | Illumina    | 162       | 2012792     | 49 | 0        | 1       | 2170  | 196         | 99   | 81   | 241         | 3      | 98    |
| <i>L. delbrueckii</i>  | 12107   | Illumina    | 166       | 2007880     | 49 | 0        | 1       | 2129  | 180         | 104  | 82   | 202         | 3      | 98    |
| <i>L. delbrueckii</i>  | 12109   | Illumina    | 162       | 1985627     | 49 | 0        | 1       | 2079  | 187         | 88   | 70   | 171         | 3      | 98    |
| <i>L. delbrueckii</i>  | 24776   | Illumina    | 175       | 1954721     | 49 | 0        | 1       | 2041  | 172         | 98   | 78   | 126         | 3      | 97    |
| <i>L. delbrueckii</i>  | 24777   | Illumina    | 168       | 1933884     | 49 | 0        | 1       | 2011  | 166         | 94   | 77   | 120         | 3      | 97    |
| <i>L. delbrueckii</i>  | 24778   | Illumina    | 166       | 1910523     | 50 | 0        | 1       | 1920  | 153         | 62   | 54   | 48          | 3      | 97    |
| <i>L. delbrueckii</i>  | 24779   | Illumina    | 171       | 1955208     | 49 | 0        | 1       | 2032  | 164         | 91   | 74   | 125         | 3      | 97    |
| <i>L. delbrueckii</i>  | 24780   | Illumina    | 175       | 1953065     | 49 | 0        | 1       | 2035  | 170         | 92   | 74   | 131         | 3      | 97    |
| <i>L. delbrueckii</i>  | 24781   | Illumina    | 171       | 1943061     | 49 | 0        | 0       | 2021  | 163         | 92   | 74   | 126         | 3      | 97    |
| <i>L. delbrueckii</i>  | 24782   | Illumina    | 173       | 1888663     | 50 | 0        | 0       | 1974  | 162         | 95   | 77   | 126         | 1      | 97    |
| <i>L. delbrueckii</i>  | 24783   | Illumina    | 176       | 1946687     | 49 | 0        | 0       | 2020  | 167         | 94   | 77   | 122         | 3      | 97    |
| <i>L. delbrueckii</i>  | 24798   | Illumina    | 171       | 1956412     | 49 | 0        | 1       | 2032  | 172         | 92   | 77   | 127         | 3      | 97    |
| <i>L. delbrueckii</i>  | LMAG    | MAG         | 1         | 2184491     | 49 | 0        | 1       | 2163  | 240         | 125  | 95   | 212         | 4      | 98    |
| <i>L. delbrueckii</i>  | 20072   | Typestrain  | 1         | 2165984     | 49 | 0        | 0       | 2152  | 228         | 124  | 94   | 210         | 1      | 98    |
