# Supplementary material for: Functional strain redundancy and persistent phage infection in Swiss hard cheese starter cultures
Source: PubMed Central journal article supplement (PMC8776748; doi:10.1038/s41396-021-01071-0), 2021-08-06
Supplement: 41396_2021_1071_MOESM3_ESM.pdf [file 41396_2021_1071_MOESM3_ESM.pdf]

## Streptococcus\_phage\_1

|                       |                 |     |       |       |         |   |
|-----------------------|-----------------|-----|-------|-------|---------|---|
| Streptococcus_phage_1 | Prodigal_v2.6.3 | CDS | 5     | 487   | 81.7 +  | 0 |
| Streptococcus_phage_1 | Prodigal_v2.6.3 | CDS | 549   | 743   | 16.4 +  | 0 |
| Streptococcus_phage_1 | Prodigal_v2.6.3 | CDS | 789   | 1952  | 224.2 + | 0 |
| Streptococcus_phage_1 | Prodigal_v2.6.3 | CDS | 1953  | 3293  | 268.8 + | 0 |
| Streptococcus_phage_1 | Prodigal_v2.6.3 | CDS | 3297  | 4340  | 203.6 + | 0 |
| Streptococcus_phage_1 | Prodigal_v2.6.3 | CDS | 4457  | 5056  | 146.7 + | 0 |
| Streptococcus_phage_1 | Prodigal_v2.6.3 | CDS | 5072  | 5935  | 187.1 + | 0 |
| Streptococcus_phage_1 | Prodigal_v2.6.3 | CDS | 6001  | 6192  | 11.2 +  | 0 |
| Streptococcus_phage_1 | Prodigal_v2.6.3 | CDS | 6206  | 6538  | 67.8 +  | 0 |
| Streptococcus_phage_1 | Prodigal_v2.6.3 | CDS | 6535  | 6846  | 56.4 +  | 0 |
| Streptococcus_phage_1 | Prodigal_v2.6.3 | CDS | 6843  | 7169  | 66 +    | 0 |
| Streptococcus_phage_1 | Prodigal_v2.6.3 | CDS | 7166  | 7555  | 63.2 +  | 0 |
| Streptococcus_phage_1 | Prodigal_v2.6.3 | CDS | 7566  | 8063  | 106.3 + | 0 |
| Streptococcus_phage_1 | Prodigal_v2.6.3 | CDS | 8179  | 8529  | 69.6 +  | 0 |
| Streptococcus_phage_1 | Prodigal_v2.6.3 | CDS | 8571  | 8882  | 39.9 +  | 0 |
| Streptococcus_phage_1 | Prodigal_v2.6.3 | CDS | 8898  | 11111 | 411.1 + | 0 |
| Streptococcus_phage_1 | Prodigal_v2.6.3 | CDS | 11121 | 11882 | 141.8 + | 0 |
| Streptococcus_phage_1 | Prodigal_v2.6.3 | CDS | 11882 | 14614 | 526.8 + | 0 |
| Streptococcus_phage_1 | Prodigal_v2.6.3 | CDS | 14626 | 16569 | 327.4 + | 0 |
| Streptococcus_phage_1 | Prodigal_v2.6.3 | CDS | 16734 | 17150 | 71.2 +  | 0 |
| Streptococcus_phage_1 | Prodigal_v2.6.3 | CDS | 17167 | 17409 | 51.3 +  | 0 |
| Streptococcus_phage_1 | Prodigal_v2.6.3 | CDS | 17411 | 18256 | 168.1 + | 0 |
| Streptococcus_phage_1 | Prodigal_v2.6.3 | CDS | 18709 | 19044 | 93.4 +  | 0 |
| Streptococcus_phage_1 | Prodigal_v2.6.3 | CDS | 19070 | 19360 | 56.7 +  | 0 |
| Streptococcus_phage_1 | Prodigal_v2.6.3 | CDS | 19389 | 19940 | 106.1 + | 0 |
| Streptococcus_phage_1 | Prodigal_v2.6.3 | CDS | 20063 | 20461 | 94.4 +  | 0 |
| Streptococcus_phage_1 | Prodigal_v2.6.3 | CDS | 20532 | 20954 | 86.7 +  | 0 |
| Streptococcus_phage_1 | Prodigal_v2.6.3 | CDS | 21141 | 22211 | 185.3 - | 0 |
| Streptococcus_phage_1 | Prodigal_v2.6.3 | CDS | 22282 | 22995 | 48 -    | 0 |
| Streptococcus_phage_1 | Prodigal_v2.6.3 | CDS | 23046 | 23432 | 58.9 -  | 0 |
| Streptococcus_phage_1 | Prodigal_v2.6.3 | CDS | 23422 | 23826 | 64.3 -  | 0 |
| Streptococcus_phage_1 | Prodigal_v2.6.3 | CDS | 23975 | 24214 | 1.8 +   | 0 |
| Streptococcus_phage_1 | Prodigal_v2.6.3 | CDS | 24226 | 24981 | 145.1 + | 0 |
| Streptococcus_phage_1 | Prodigal_v2.6.3 | CDS | 24993 | 25274 | 55.8 +  | 0 |
| Streptococcus_phage_1 | Prodigal_v2.6.3 | CDS | 25652 | 26485 | 162 +   | 0 |
| Streptococcus_phage_1 | Prodigal_v2.6.3 | CDS | 26498 | 27280 | 126.1 + | 0 |
| Streptococcus_phage_1 | Prodigal_v2.6.3 | CDS | 27277 | 27459 | 28.7 +  | 0 |
| Streptococcus_phage_1 | Prodigal_v2.6.3 | CDS | 27615 | 28277 | 141.5 + | 0 |
| Streptococcus_phage_1 | Prodigal_v2.6.3 | CDS | 28280 | 29239 | 213.6 + | 0 |
| Streptococcus_phage_1 | Prodigal_v2.6.3 | CDS | 29260 | 29706 | 86.9 +  | 0 |
| Streptococcus_phage_1 | Prodigal_v2.6.3 | CDS | 29721 | 30176 | 63 +    | 0 |
| Streptococcus_phage_1 | Prodigal_v2.6.3 | CDS | 30173 | 30409 | 32.5 +  | 0 |
| Streptococcus_phage_1 | Prodigal_v2.6.3 | CDS | 30400 | 30573 | 20.7 +  | 0 |
| Streptococcus_phage_1 | Prodigal_v2.6.3 | CDS | 30611 | 30766 | 26.9 +  | 0 |
| Streptococcus_phage_1 | Prodigal_v2.6.3 | CDS | 30891 | 31274 | 50.1 +  | 0 |
| Streptococcus_phage_1 | Prodigal_v2.6.3 | CDS | 31287 | 31790 | 93.9 +  | 0 |
| Streptococcus_phage_1 | Prodigal_v2.6.3 | CDS | 31791 | 32303 | 107.1 + | 0 |
| Streptococcus_phage_1 | Prodigal_v2.6.3 | CDS | 32272 | 32580 | 55.3 +  | 0 |
| Streptococcus_phage_1 | Prodigal_v2.6.3 | CDS | 32577 | 33284 | 135.1 + | 0 |
| Streptococcus_phage_1 | Prodigal_v2.6.3 | CDS | 33649 | 34098 | 73.5 +  | 0 |

## Streptococcus\_phage\_1

ID=1\_1;name=hypothetical protein rmk202\_01\_49  
ID=1\_2;name=small terminase subunit  
ID=1\_3;name=large terminase subunit  
ID=1\_4;name=portal protein  
ID=1\_5;name=minor capsid protein  
ID=1\_6;name=scaffolding protein  
ID=1\_7;name=major capsid protein  
ID=1\_8;name=hypothetical protein rmk202\_01\_08  
ID=1\_9;name=head-tail connector protein  
ID=1\_10;name=Head-closure protein  
ID=1\_11;name=tail protein  
ID=1\_12;name=tail completion protein  
ID=1\_13;name=major tail protein  
ID=1\_14;name=tail chaperone protein  
ID=1\_15;name=hypothetical protein rmk202\_01\_15  
ID=1\_16;name=tape-measure protein  
ID=1\_17;name=distal tail protein  
ID=1\_18;name=tail-associated lysin  
ID=1\_19;name=upper baseplate protein  
ID=1\_20;name=transcription termination factor  
ID=1\_21;name=holin  
ID=1\_22;name=lysin  
ID=1\_23;name=hypothetical protein rmk202\_01\_23  
ID=1\_24;name=hypothetical protein rmk202\_01\_24  
ID=1\_25;name=Acr-like protein  
ID=1\_26;name=AcrIIA3-like protein  
ID=1\_27;name=hypothetical protein rmk202\_01\_27  
ID=1\_28;name=Integrase  
ID=1\_29;name=putative protease  
ID=1\_30;name=ImmA/IrrE family metallo-endopeptidase  
ID=1\_31;name=putative repressor  
ID=1\_32;name=transcriptional regulator  
ID=1\_33;name=antirepressor protein  
ID=1\_34;name=DNA-binding protein  
ID=1\_35;name=replication initiation  
ID=1\_36;name=helicase loader  
ID=1\_37;name=hypothetical protein rmk202\_01\_37  
ID=1\_38;name=Erf protein  
ID=1\_39;name=hypothetical protein rmk202\_01\_39  
ID=1\_40;name=single-stranded DNA-binding protein  
ID=1\_41;name=holliday junction resolvase  
ID=1\_42;name=hypothetical protein rmk202\_01\_42  
ID=1\_43;name=hypothetical protein rmk202\_01\_43  
ID=1\_44;name=hypothetical protein rmk202\_01\_44  
ID=1\_45;name=hypothetical protein rmk202\_01\_45  
ID=1\_46;name=hypothetical protein rmk202\_01\_46  
ID=1\_47;name=DNA-binding protein  
ID=1\_48;name=hypothetical protein rmk202\_01\_48  
ID=1\_49;name=hypothetical protein rmk202\_01\_49  
ID=1\_50;name=ArpU late transcriptional regulator

## Streptococcus\_phage\_2

|                       |                 |     |       |       |         |   |
|-----------------------|-----------------|-----|-------|-------|---------|---|
| Streptococcus_phage_2 | Prodigal_v2.6.3 | CDS | 3     | 134   | 7.7 +   | 0 |
| Streptococcus_phage_2 | Prodigal_v2.6.3 | CDS | 88    | 522   | 43.7 +  | 0 |
| Streptococcus_phage_2 | Prodigal_v2.6.3 | CDS | 703   | 1164  | 86 +    | 0 |
| Streptococcus_phage_2 | Prodigal_v2.6.3 | CDS | 1177  | 3048  | 312.5 + | 0 |
| Streptococcus_phage_2 | Prodigal_v2.6.3 | CDS | 3006  | 3170  | 4.6 +   | 0 |
| Streptococcus_phage_2 | Prodigal_v2.6.3 | CDS | 3249  | 4409  | 200.8 + | 0 |
| Streptococcus_phage_2 | Prodigal_v2.6.3 | CDS | 4396  | 5064  | 141.7 + | 0 |
| Streptococcus_phage_2 | Prodigal_v2.6.3 | CDS | 5079  | 6272  | 277.2 + | 0 |
| Streptococcus_phage_2 | Prodigal_v2.6.3 | CDS | 6287  | 6601  | 11 +    | 0 |
| Streptococcus_phage_2 | Prodigal_v2.6.3 | CDS | 6601  | 6951  | 60.5 +  | 0 |
| Streptococcus_phage_2 | Prodigal_v2.6.3 | CDS | 6958  | 7383  | 70.3 +  | 0 |
| Streptococcus_phage_2 | Prodigal_v2.6.3 | CDS | 7384  | 7755  | 68.9 +  | 0 |
| Streptococcus_phage_2 | Prodigal_v2.6.3 | CDS | 7777  | 8388  | 151.6 + | 0 |
| Streptococcus_phage_2 | Prodigal_v2.6.3 | CDS | 8464  | 8817  | 89.9 +  | 0 |
| Streptococcus_phage_2 | Prodigal_v2.6.3 | CDS | 9036  | 13847 | 980.6 + | 0 |
| Streptococcus_phage_2 | Prodigal_v2.6.3 | CDS | 13844 | 15409 | 255.5 + | 0 |
| Streptococcus_phage_2 | Prodigal_v2.6.3 | CDS | 15409 | 19329 | 770.4 + | 0 |
| Streptococcus_phage_2 | Prodigal_v2.6.3 | CDS | 19332 | 21407 | 340.9 + | 0 |
| Streptococcus_phage_2 | Prodigal_v2.6.3 | CDS | 21428 | 21823 | 86.8 +  | 0 |
| Streptococcus_phage_2 | Prodigal_v2.6.3 | CDS | 21830 | 21976 | 25.2 +  | 0 |
| Streptococcus_phage_2 | Prodigal_v2.6.3 | CDS | 21990 | 22313 | 64.5 +  | 0 |
| Streptococcus_phage_2 | Prodigal_v2.6.3 | CDS | 22322 | 22564 | 38.1 +  | 0 |
| Streptococcus_phage_2 | Prodigal_v2.6.3 | CDS | 22566 | 23411 | 173.7 + | 0 |
| Streptococcus_phage_2 | Prodigal_v2.6.3 | CDS | 23729 | 24064 | 92.5 +  | 0 |
| Streptococcus_phage_2 | Prodigal_v2.6.3 | CDS | 24090 | 24380 | 59.7 +  | 0 |
| Streptococcus_phage_2 | Prodigal_v2.6.3 | CDS | 24409 | 24960 | 109.6 + | 0 |
| Streptococcus_phage_2 | Prodigal_v2.6.3 | CDS | 25083 | 25481 | 93.9 +  | 0 |
| Streptococcus_phage_2 | Prodigal_v2.6.3 | CDS | 25552 | 25974 | 82.9 +  | 0 |
| Streptococcus_phage_2 | Prodigal_v2.6.3 | CDS | 26161 | 27231 | 159.6 - | 0 |
| Streptococcus_phage_2 | Prodigal_v2.6.3 | CDS | 27302 | 28015 | 68.7 -  | 0 |
| Streptococcus_phage_2 | Prodigal_v2.6.3 | CDS | 28066 | 28452 | 57.3 -  | 0 |
| Streptococcus_phage_2 | Prodigal_v2.6.3 | CDS | 28442 | 28846 | 55.6 -  | 0 |
| Streptococcus_phage_2 | Prodigal_v2.6.3 | CDS | 28995 | 29234 | 17.8 +  | 0 |
| Streptococcus_phage_2 | Prodigal_v2.6.3 | CDS | 29246 | 30001 | 135.9 + | 0 |
| Streptococcus_phage_2 | Prodigal_v2.6.3 | CDS | 30013 | 30294 | 44.7 +  | 0 |
| Streptococcus_phage_2 | Prodigal_v2.6.3 | CDS | 30672 | 31517 | 142.3 + | 0 |
| Streptococcus_phage_2 | Prodigal_v2.6.3 | CDS | 31530 | 32312 | 124.4 + | 0 |
| Streptococcus_phage_2 | Prodigal_v2.6.3 | CDS | 32309 | 32491 | 25.7 +  | 0 |
| Streptococcus_phage_2 | Prodigal_v2.6.3 | CDS | 32648 | 33307 | 131.5 + | 0 |
| Streptococcus_phage_2 | Prodigal_v2.6.3 | CDS | 33310 | 34281 | 209.1 + | 0 |
| Streptococcus_phage_2 | Prodigal_v2.6.3 | CDS | 34281 | 34730 | 96.1 +  | 0 |
| Streptococcus_phage_2 | Prodigal_v2.6.3 | CDS | 34740 | 35201 | 68.2 +  | 0 |
| Streptococcus_phage_2 | Prodigal_v2.6.3 | CDS | 35289 | 35447 | 25.8 +  | 0 |
| Streptococcus_phage_2 | Prodigal_v2.6.3 | CDS | 35440 | 36192 | 132.1 + | 0 |
| Streptococcus_phage_2 | Prodigal_v2.6.3 | CDS | 36269 | 36652 | 57 +    | 0 |
| Streptococcus_phage_2 | Prodigal_v2.6.3 | CDS | 36665 | 37015 | 77.7 +  | 0 |
| Streptococcus_phage_2 | Prodigal_v2.6.3 | CDS | 36984 | 37292 | 36.4 +  | 0 |
| Streptococcus_phage_2 | Prodigal_v2.6.3 | CDS | 37289 | 37996 | 131.7 + | 0 |
| Streptococcus_phage_2 | Prodigal_v2.6.3 | CDS | 38288 | 38686 | 68.8 +  | 0 |

## Streptococcus\_phage\_2

ID=1\_1;name=HNH endonuclease  
ID=1\_2;name=terminase small subunit  
ID=1\_3;name=large terminase subunit  
ID=1\_4;name=hypothetical protein rmk202\_02\_04  
ID=1\_5;name=portal protein  
ID=1\_6;name=putative scaffolding protein  
ID=1\_7;name=major capsid protein  
ID=1\_8;name=head-tail connector protein  
ID=1\_9;name=Head-closure protein  
ID=1\_10;name=tail protein  
ID=1\_11;name=tail completion protein  
ID=1\_12;name=major tail protein  
ID=1\_13;name=tail protein  
ID=1\_14;name=tape measure protein  
ID=1\_15;name=distal tail protein  
ID=1\_16;name=capsid and scaffold protein  
ID=1\_17;name=baseplate component  
ID=1\_18;name=hypothetical protein rmk202\_02\_18  
ID=1\_19;name=hypothetical protein rmk202\_02\_19  
ID=1\_20;name=hypothetical protein rmk202\_02\_20  
ID=1\_21;name=holin  
ID=1\_22;name=lysin  
ID=1\_23;name=hypothetical protein rmk202\_02\_23  
ID=1\_24;name=hypothetical protein rmk202\_02\_24  
ID=1\_25;name=Acr-like protein  
ID=1\_26;name=AcrIIA3-like protein  
ID=1\_27;name=hypothetical protein rmk202\_02\_27  
ID=1\_28;name=Integrase  
ID=1\_29;name=putative protease  
ID=1\_30;name=ImmA/IrrE family metallo-endopeptidase  
ID=1\_31;name=putative repressor  
ID=1\_32;name=transcriptional regulator  
ID=1\_33;name=antirepressor protein  
ID=1\_34;name=hypothetical protein rmk202\_02\_34  
ID=1\_35;name=replication initiation  
ID=1\_36;name=helicase loader  
ID=1\_37;name=hypothetical protein rmk202\_02\_37  
ID=1\_38;name=single-stranded DNA-binding protein  
ID=1\_39;name=hypothetical protein rmk202\_02\_39  
ID=1\_40;name=single-stranded DNA-binding protein  
ID=1\_41;name=endodeoxyribonuclease RusA  
ID=1\_42;name=hypothetical protein rmk202\_02\_42  
ID=1\_43;name=adenine-specific methyltransferase  
ID=1\_44;name=hypothetical protein rmk202\_02\_44  
ID=1\_45;name=DNA-binding protein  
ID=1\_46;name=hypothetical protein rmk202\_02\_46  
ID=1\_47;name=hypothetical protein rmk202\_02\_47  
ID=1\_48;name=late transcriptional regulator  
ID=1\_49;name=hypothetical protein rmk202\_02\_49
